# Supplementary material for: Bisulfite induced chemiluminescence of g-C3N4nanosheets and enhanced by metal ions
Source: Royal Society of Chemistry journal article supplement (doi:10.1039/c5nr08943c), 2016-01-01
Supplement: c5nr08943c1.pdf [file c5nr08943c1.pdf]

## **Supporting Information**

### **Bisulfate Induced Chemiluminescence of g-C<sub>3</sub>N<sub>4</sub> Nanosheets and Enhanced by Metal Ions**

Yongzan Zheng, Xiangnan Dou, Haifang Li, and Jin-Ming Lin\*

Beijing Key Laboratory of Microanalytical Methods and Instrumentation, Department of Chemistry, Tsinghua University,  
Beijing 100084, People's Republic of China

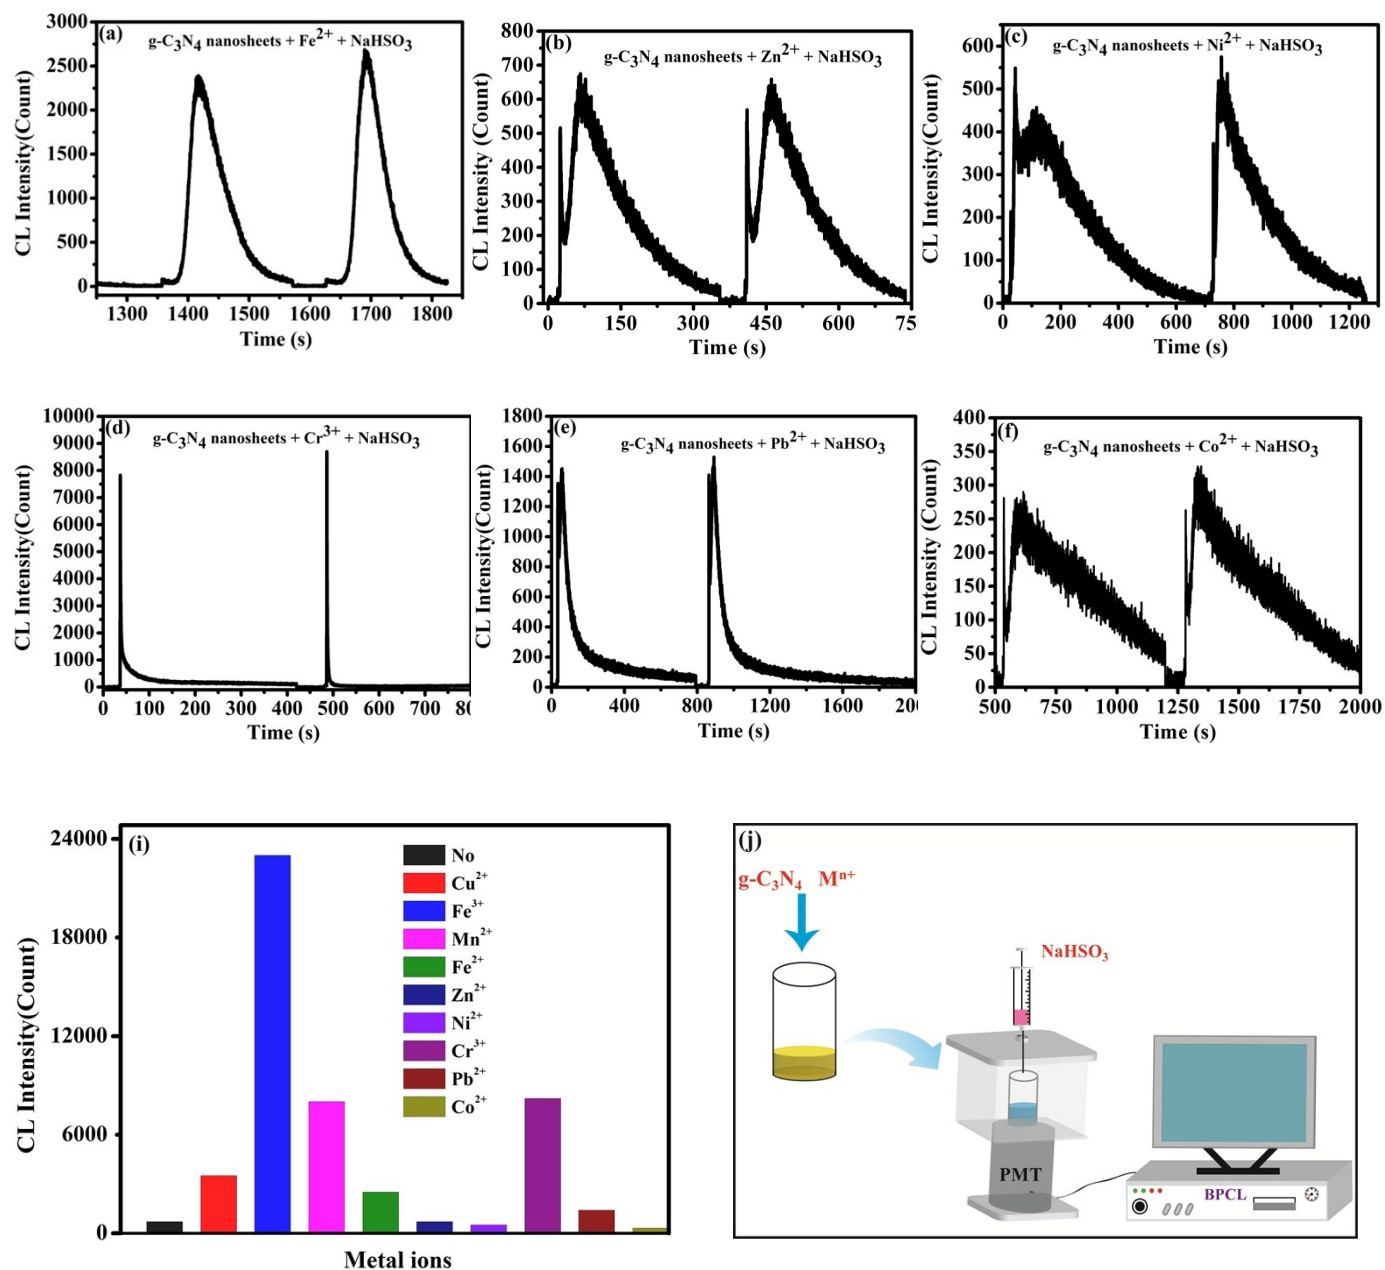

**Fig. S1** Kinetic curves of CL of (a) g-C<sub>3</sub>N<sub>4</sub> nanosheets-Fe<sup>2+</sup>-NaHSO<sub>3</sub> system, (b) g-C<sub>3</sub>N<sub>4</sub> nanosheets-Zn<sup>2+</sup>-NaHSO<sub>3</sub> system, (c) g-C<sub>3</sub>N<sub>4</sub> nanosheets-Ni<sup>2+</sup>-NaHSO<sub>3</sub> system, (d) g-C<sub>3</sub>N<sub>4</sub> nanosheets-Cr<sup>3+</sup>-NaHSO<sub>3</sub> system, (e) g-C<sub>3</sub>N<sub>4</sub> nanosheets-Pb<sup>2+</sup>-NaHSO<sub>3</sub> system, (f) g-C<sub>3</sub>N<sub>4</sub> nanosheets-Co<sup>2+</sup>-NaHSO<sub>3</sub> system, when 50  $\mu$ L of 10<sup>-3</sup> M NaHSO<sub>3</sub> was injected into the mixture of 50  $\mu$ L of 10<sup>-3</sup> M M<sup>n+</sup> (metal ions) and 50  $\mu$ L 2.5  $\mu$ g/ $\mu$ L g-C<sub>3</sub>N<sub>4</sub> nanosheets. (i) Compare the CL intensity of g-C<sub>3</sub>N<sub>4</sub> nanosheets- NaHSO<sub>3</sub> system with different metal ions. (j) Schematic diagram of the bath method CL detection system.

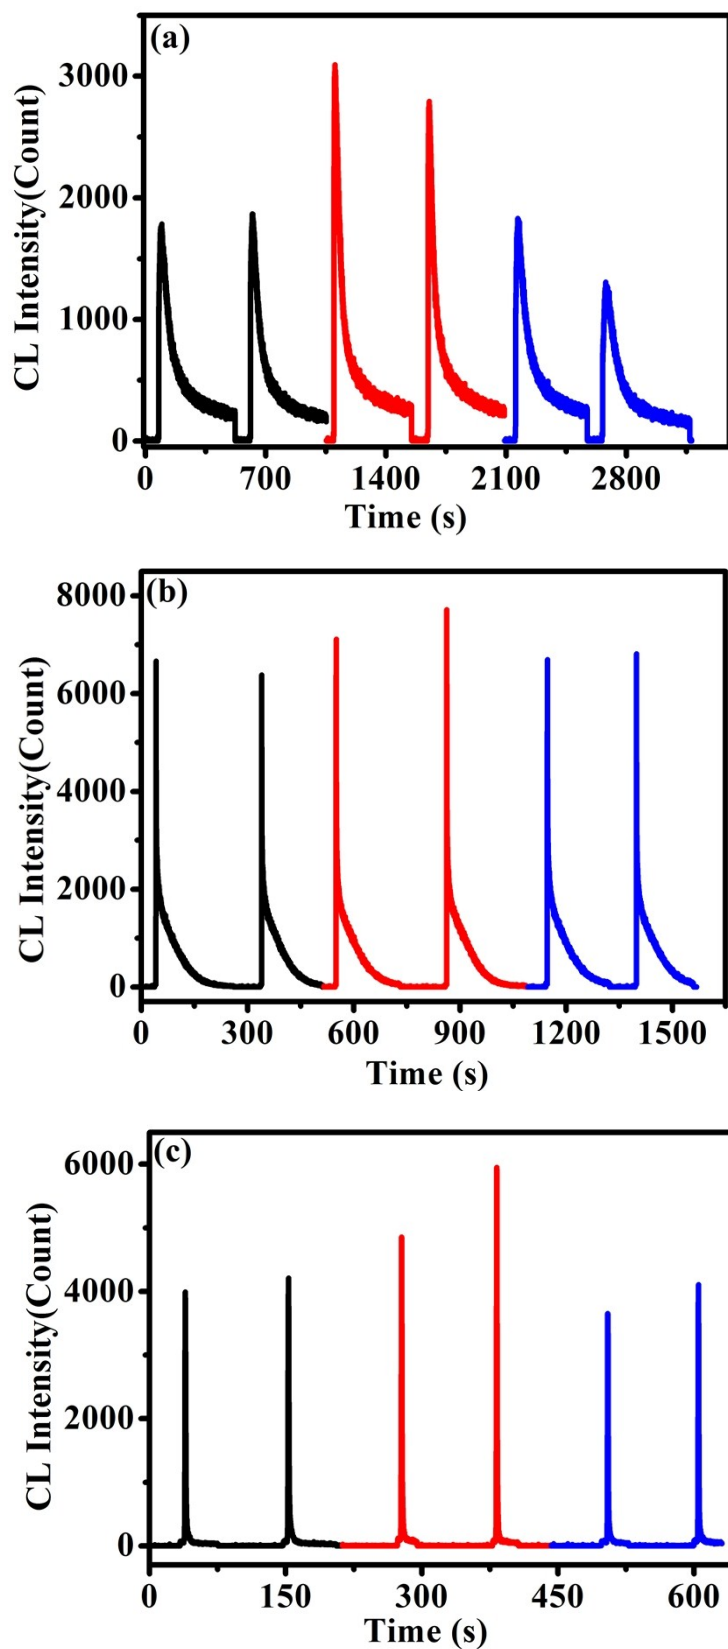

**Fig. S2** The kinetic curves of g-C<sub>3</sub>N<sub>4</sub>nanosheets-M<sup>n+</sup>-NaHSO<sub>3</sub> CL systems: (a) Cu<sup>2+</sup>, (b) Fe<sup>3+</sup>, (c) Mn<sup>2+</sup>, the CL the solution was bubbled with O<sub>2</sub> (red) or N<sub>2</sub> (blue) for 20 min before injecting. The concentration of g-C<sub>3</sub>N<sub>4</sub> nanosheets, M<sup>n+</sup> and NaHSO<sub>3</sub> were 2.5 μg/μl, 10<sup>-3</sup> M and 10<sup>-3</sup> M, respectively.

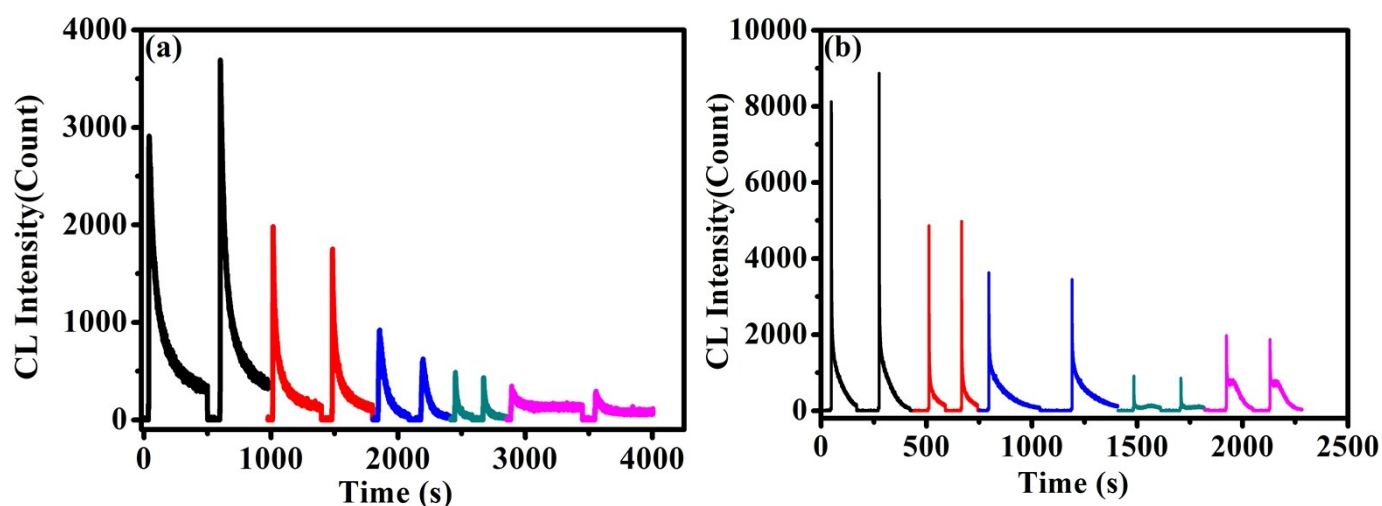

**Fig. S3** The Kinetic curves of (a) g-C<sub>3</sub>N<sub>4</sub> nanosheets-Cu<sup>2+</sup>-NaHSO<sub>3</sub> and (b) g-C<sub>3</sub>N<sub>4</sub> nanosheets-Fe<sup>3+</sup>-NaHSO<sub>3</sub> CL systems with different radical scavengers: NBT (red), NaN<sub>3</sub> (blue), thiourea (green) and ascorbic acid (pink).

**Table S2** Effects of radical scavengers on g-C<sub>3</sub>N<sub>4</sub> nanosheets-Cu<sup>2+</sup>-NaHSO<sub>3</sub> and g-C<sub>3</sub>N<sub>4</sub> nanosheets-Fe<sup>3+</sup>-NaHSO<sub>3</sub> CL systems

| Radical scavengers | Concentration (M)    | CL intensity of g-C <sub>3</sub> N <sub>4</sub> nanosheets-Cu <sup>2+</sup> -NaHSO <sub>3</sub> (Count) | CL intensity of g-C <sub>3</sub> N <sub>4</sub> nanosheets-Fe <sup>3+</sup> -NaHSO <sub>3</sub> (Count) |
|--------------------|----------------------|---------------------------------------------------------------------------------------------------------|---------------------------------------------------------------------------------------------------------|
| H <sub>2</sub> O   |                      | 3200                                                                                                    | 8200                                                                                                    |
| NBT                | 1.0×10 <sup>-3</sup> | 1800                                                                                                    | 5000                                                                                                    |
| NaN <sub>3</sub>   | 1.0×10 <sup>-2</sup> | 900                                                                                                     | 3800                                                                                                    |
| Thiourea           | 1.0×10 <sup>-3</sup> | 500                                                                                                     | 1000                                                                                                    |
| Ascorbic acid      | 1.0×10 <sup>-3</sup> | 400                                                                                                     | 1800                                                                                                    |

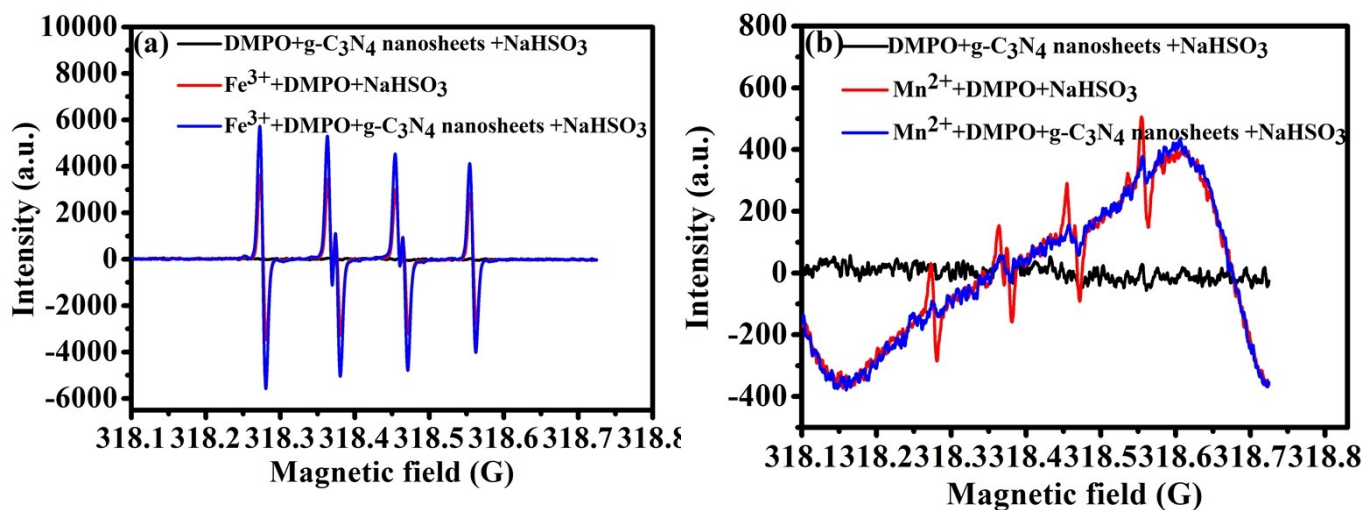

**Fig. S4** ESR spectra of  $\cdot\text{SO}_3^-$  radicals. (a)  $\cdot\text{SO}_3^-$  radicals increased when g-C<sub>3</sub>N<sub>4</sub> nanosheets are added into the solution of and NaHSO<sub>3</sub> and Fe<sup>3+</sup>. (b)  $\cdot\text{SO}_3^-$  radicals increased when g-C<sub>3</sub>N<sub>4</sub> nanosheets are added into the solution of and NaHSO<sub>3</sub> and Mn<sup>2+</sup>.

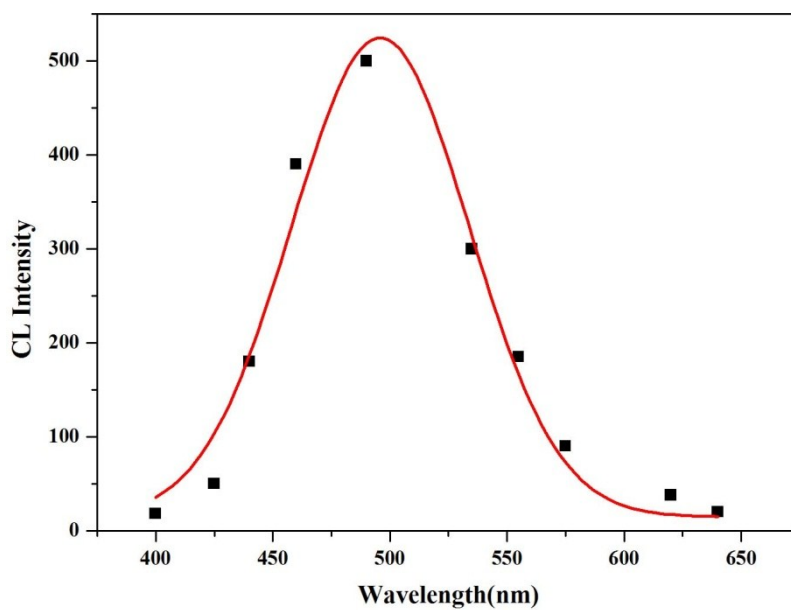

**Fig. S5** CL spectra of g-C<sub>3</sub>N<sub>4</sub> nanosheets-Cu<sup>2+</sup>-NaHSO<sub>3</sub> system.
